# Supplementary material for: Antioxidant Responses and Growth Impairment in Cucurbita moschata Infected by Meloidogyne incognita
Source: MDPI journal article supplement (doi:10.3390/biology13040267), 2024-04-16
Supplement: s1 [file s1]

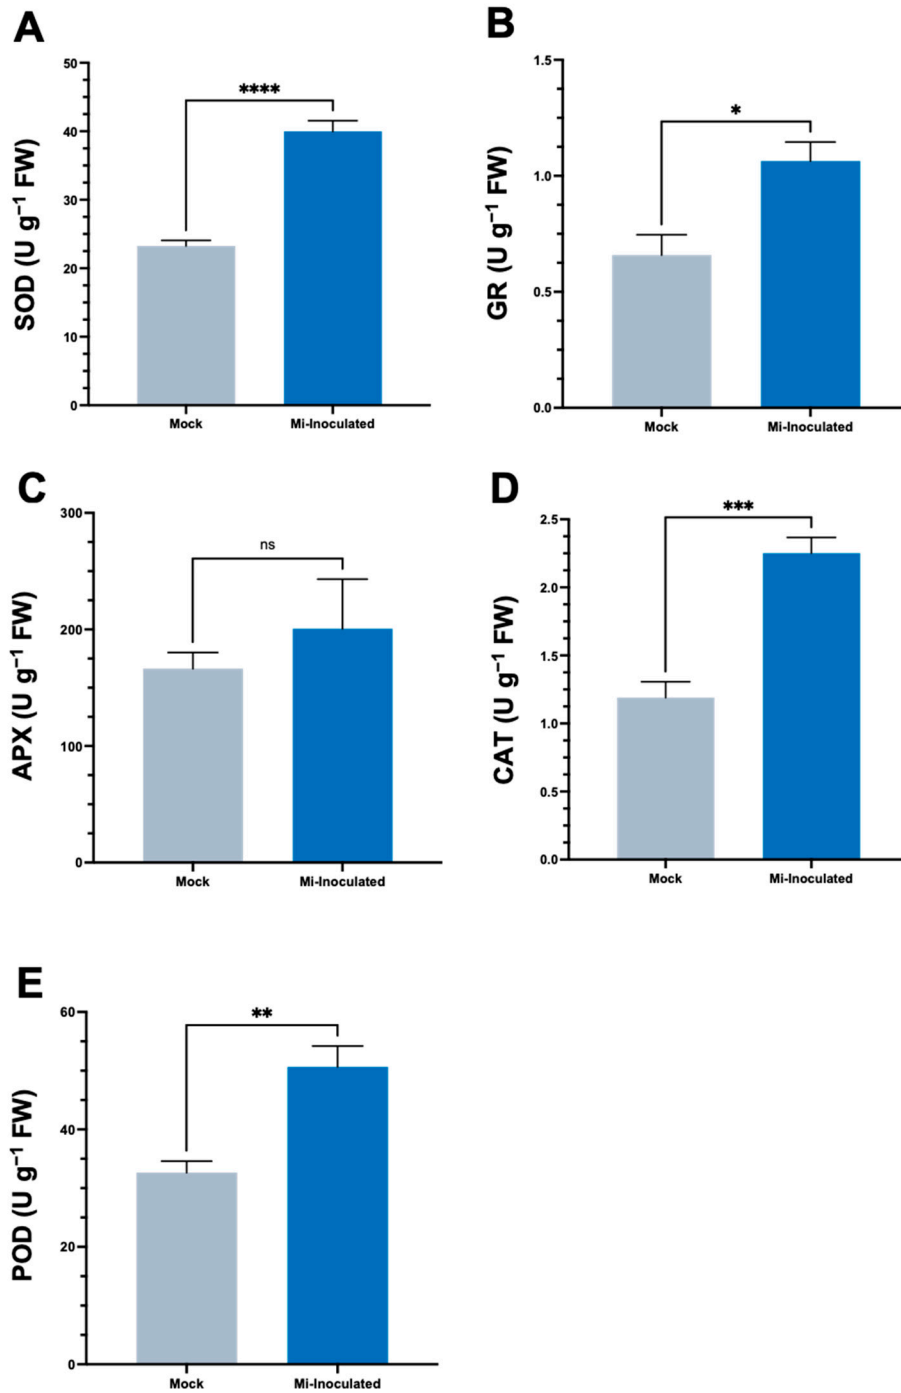

**Figure S1.** The effect of *Meloidogyne incognita* on antioxidative enzyme activities in *Cucurbita moschata*. Superoxide dismutase (SOD) (A), glutathione reductase (GR) (B), ascorbate peroxidase (APX) (C), catalase (CAT) (D), and peroxidase (POD) (E). *Meloidogyne incognita*-inoculated plants are labeled as Mi-inoculated. The values represent mean  $\pm$  SE (n = 5); \* indicates  $p \leq 0.05$ ; \*\* indicates  $p \leq 0.01$ ; \*\*\* indicates  $p \leq 0.001$ ; \*\*\*\* indicates  $p \leq 0.0001$ ; and ns denotes no statistical significance. Student's *t* test comparing groups as indicated.
